# Supplementary material for: Neuroserpin Inclusion Bodies in a FENIB Yeast Model
Source: MDPI journal article supplement (doi:10.3390/microorganisms9071498), 2021-07-13

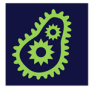

Supplementary figures

**Figure S1:** Percentage of cells displaying foci of NS<sub>WT</sub>-GFP or NS<sub>GE</sub>-GFP when expressed in the BY4741 (A) and CML39-11A (B) wild type strains and the MCY4/Kllsm4Δ1 mutant strain (C). The quantifications of cells with neuroserpin foci were obtained by manual inspection of at least 200 cells per strain in two independent experiments.

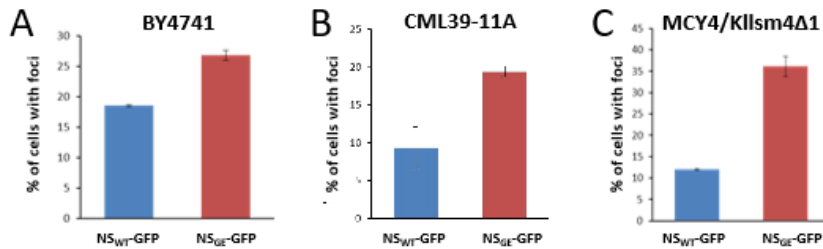

**Figure S2:** Growth (A), chronological lifespan (B) and H<sub>2</sub>O<sub>2</sub> resistance (C) of CML39-11A cells expressing either NS<sub>WT</sub>-GFP, NS<sub>GE</sub>-GFP or native GFP as indicated. For H<sub>2</sub>O<sub>2</sub> resistance, the viability was monitored by counting the colony forming units (CFU) and was measured after exposure to H<sub>2</sub>O<sub>2</sub> at the indicated concentrations for 4 h. The average of three independent experiments and standard deviation are presented. P-values: \*p < 0,05.

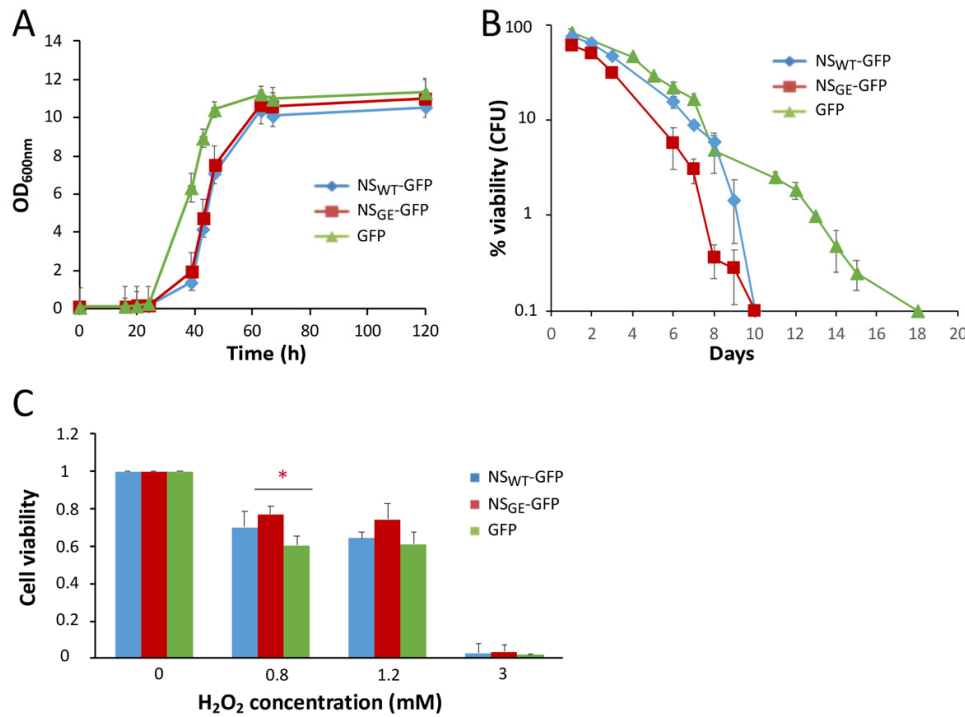

Supplement: s1 [file s1]
